# Supplementary material for: Feature Identification of Compensatory Gene Pairs without Sequence Homology in Yeast
Source: Comp Funct Genomics. 2012 Aug 16;2012:653174. doi: 10.1155/2012/653174 (PMC3431050; doi:10.1155/2012/653174)
Supplement: Supplementary file 1 — The Supplementary table contains candidates of compensatory gene which identified by the features from this study.Most of gene pairs show high change of mRNA expression when a mutation or deletion of their SSL partner occurs. The citation numbers of references in the table are corresponding with the reference in the main text. [file 653174.f1.xlsx]

## Sheet: main
The table presents candidates of compensatory gene. Most of gene pairs show large changes of mRNA expression when mutation or deletion of their SSL partner occurs. t, Expression ratio (log ratio) values represent the changes in level of expression of gene 2 as gene 1 knockout. The values of expression ratio were extracted from mRNA profile by Hughes et al. [38]. Interaction types of each pair wer…
Gene 1					Gene 2					Interaction between Gene 1 and Gene 2	References about functional compensation
Protein	Gene ID	Description	molecular functions	Related cellular component	Protein	Gene ID	Description	molecular functions	Related cellular component
ADE3	YGR204W	Cytoplasmic trifunctional enzyme C1-tetrahydrofolate synthase, involved in single carbon metabolism and required for biosynthesis of purines, thymidylate, methionine, and histidine; null mutation causes auxotrophy for adenine and histidine	formate-tetrahydrofolate ligase activity methenyltetrahydrofolate cyclohydrolase activity methylenetetrahydrofolate dehydrogenase	cytoplasm nucleus	SHM1	YBR263W	Mitochondrial serine hydroxymethyltransferase, converts serine to glycine plus 5,10 methylenetetrahydrofolate; involved in generating precursors for purine, pyrimidine, amino acid, and lipid biosynthesis; reverse reaction generates serine	glycine hydroxymethyltransferase activity one-carbon metabolic process serine family amino acid biosynthetic process	mitochondrion	Genetic Interaction
ARC40	YBR234C	Subunit of the ARP2/3 complex, which is required for the motility and integrity of cortical actin patches	ubiquitin binding actin filament organization actin nucleation mitochondrion inheritance	Arp2/3 protein complex (IDA)	CHS5	YLR330W	Component of the exomer complex, which also contains Csh6p, Bch1p, Bch2p, and Bud7p and is involved in export of selected proteins, such as chitin synthase Chs3p, from the Golgi to the plasma membrane	ascospore wall assembly cell wall chitin catabolic process cellular bud site selection conjugation with cellular fusion Golgi to plasma membrane transport regulation of transcription, DNA-dependent	cytoplasm exomer complex	Genetic Interaction
ASE1	YOR058C	Mitotic spindle midzone localized microtubule-associated protein (MAP) family member; required for spindle elongation and stabilization; undergoes cell cycle-regulated degradation by anaphase promoting complex; potential Cdc28p substrate	microtubule binding cytokinesis, completion of separation microtubule bundle formation mitotic anaphase B mitotic spindle elongation mitotic spindle stabilization spindle midzone assembly spindle pole body separation	nuclear microtubule spindle spindle midzone	BIK1	YCL029C	Microtubule-associated protein, component of the interface between microtubules and kinetochore, involved in sister chromatid separation; essential in polyploid cells but not in haploid or diploid cells; ortholog of mammalian CLIP-170	microtubule binding protein homodimerization activity karyogamy involved in conjugation with cellular fusion mitotic anaphase B mitotic spindle elongation mitotic spindle organization in nucleus negative regulation of microtubule polymerization nuclear migration involved in conjugation with cellular fusion	cell cortex condensed nuclear chromosome kinetochore kinetochore mating projection tip microtubule plus end spindle spindle microtubule spindle pole body	Genetic Interaction
BFA1	YJR053W	Component of the GTPase-activating Bfa1p-Bub2p complex involved in multiple cell cycle checkpoint pathways that control exit from mitosis	GTPase activator activity mitotic cell cycle spindle orientation checkpoint regulation of exit from mitosis	spindle pole body	KAR9	YPL269W	Karyogamy protein required for correct positioning of the mitotic spindle and for orienting cytoplasmic microtubules, localizes at the shmoo tip in mating cells and at the tip of the growing bud in small-budded cells through anaphase	establishment of spindle localization nuclear migration along microtubule	cell cortex mating projection tip spindle pole body	Genetic Interaction
CDC45	YLR103C	DNA replication initiation factor; recruited to MCM pre-RC complexes at replication origins; promotes release of MCM from Mcm10p, recruits elongation machinery; mutants in human homolog may cause velocardiofacial and DiGeorge syndromes	chromatin binding DNA replication origin binding DNA-dependent DNA replication initiation double-strand break repair via break-induced replication pre-replicative complex assembly regulation of chromatin silencing at telomere S phase of mitotic cell cycle	DNA replication preinitiation complex nuclear replication fork nucleus pre-replicative complex replication fork protection complex	TOF1	YNL273W	Subunit of a replication-pausing checkpoint complex (Tof1p-Mrc1p-Csm3p) that acts at the stalled replication fork to promote sister chromatid cohesion after DNA damage, facilitating gap repair of damaged DNA; interacts with the MCM helicase	DNA repair DNA replication DNA replication checkpoint maintenance of DNA repeat elements mitotic sister chromatid cohesion replication fork arrest replication fork protection	nuclear chromosome nuclear replication fork replication fork protection complex	Physical Interaction, Genetic Interaction
CDC45	YLR103C	DNA replication initiation factor; recruited to MCM pre-RC complexes at replication origins; promotes release of MCM from Mcm10p, recruits elongation machinery; mutants in human homolog may cause velocardiofacial and DiGeorge syndromes	chromatin binding DNA replication origin binding DNA-dependent DNA replication initiation double-strand break repair via break-induced replication pre-replicative complex assembly regulation of chromatin silencing at telomere S phase of mitotic cell cycle	DNA replication preinitiation complex nuclear replication fork nucleus pre-replicative complex replication fork protection complex	TOP3	YLR234W	DNA Topoisomerase III, conserved protein that functions in a complex with Sgs1p and Rmi1p to relax single-stranded negatively-supercoiled DNA preferentially, involved in telomere stability and regulation of mitotic recombination	DNA topoisomerase type I activity mitotic sister chromatid cohesion reciprocal meiotic recombination regulation of DNA recombination telomere maintenance via telomerase	nucleus RecQ helicase-Topo III complex	Genetic Interaction
CDC6	YJL194W	Essential ATP-binding protein required for DNA replication, component of the pre-replicative complex (pre-RC) which requires ORC to associate with chromatin and is in turn required for Mcm2-7p DNA association; homologous to S. pombe Cdc18p	ATP binding ATPase activity chromatin binding DNA replication origin binding GTP binding GTPase activity protein binding G1/S transition of mitotic cell cycle pre-replicative complex assembly regulation of chromatin silencing at telomere regulation of DNA-dependent DNA replication initiation	DNA replication preinitiation complex pre-replicative complex	CTF18	YMR078C	Subunit of a complex with Ctf8p that shares some subunits with Replication Factor C and is required for sister chromatid cohesion; may have overlapping functions with Rad24p in the DNA damage replication checkpoint	DNA-dependent DNA replication initiation double-strand break repair via homologous recombination maintenance of DNA trinucleotide repeats mitotic sister chromatid cohesion	Ctf18 RFC-like complex nuclear replication fork	Genetic Interaction
CIN1	YOR349W	Tubulin folding factor D involved in beta-tubulin (Tub2p) folding; isolated as mutant with increased chromosome loss and sensitivity to benomyl	beta-tubulin binding protein folding tubulin complex assembly tubulin complex biogenesis	cellular_component unknown	CTF19	YPL018W	outer kinetochore protein, required for accurate mitotic chromosome segregation; component of the kinetochore sub-complex COMA (Ctf19p, Okp1p, Mcm21p, Ame1p) that functions as a platform for kinetochore assembly	attachment of spindle microtubules to kinetochore chromosome segregation establishment of mitotic sister chromatid cohesion	COMA complex condensed nuclear chromosome kinetochore nucleus	Genetic Interaction
CIN8	YEL061C	Kinesin motor protein involved in mitotic spindle assembly and chromosome segregation	minus-end-directed microtubule motor activity plus-end-directed microtubule motor activity microtubule depolymerization mitotic anaphase B mitotic sister chromatid segregation mitotic spindle organization in nucleus spindle pole body separation	astral microtubule condensed nuclear chromosome kinetochore kinesin complex kinetochore microtubule spindle microtubule	BIM1	YER016W	Microtubule-binding protein that together with Kar9p makes up the cortical microtubule capture site and delays the exit from mitosis when the spindle is oriented abnormally	microtubule plus-end binding protein homodimerization activity structural constituent of cytoskeleton microtubule depolymerization microtubule nucleation mitotic cell cycle spindle assembly checkpoint mitotic sister chromatid cohesion negative regulation of microtubule depolymerization nuclear migration along microtubule positive regulation of microtubule polymerization	cytoplasmic microtubule kinetochore microtubule plus end spindle spindle midzone spindle pole spindle pole body	Genetic Interaction
CIN8	YEL061C	Kinesin motor protein involved in mitotic spindle assembly and chromosome segregation	minus-end-directed microtubule motor activity plus-end-directed microtubule motor activity microtubule depolymerization mitotic anaphase B mitotic sister chromatid segregation mitotic spindle organization in nucleus spindle pole body separation	astral microtubule condensed nuclear chromosome kinetochore kinesin complex kinetochore microtubule spindle microtubule	KIP1	YBL063W	Kinesin-related motor protein required for mitotic spindle assembly, chromosome segregation, and 2 micron plasmid partitioning; functionally redundant with Cin8p for chromosomal but not plasmid functions	microtubule motor activity structural constituent of cytoskeleton microtubule depolymerization mitotic anaphase B mitotic sister chromatid segregation plasmid partitioning spindle pole body separation	kinesin complex spindle microtubule spindle pole body	Genetic Interaction
FKS1	YLR342W	Catalytic subunit of 1,3-beta-D-glucan synthase, functionally redundant with alternate catalytic subunit Gsc2p; binds to regulatory subunit Rho1p; involved in cell wall synthesis and maintenance; localizes to sites of cell wall remodeling	1,3-beta-D-glucan synthase activity (1->3)-beta-D-glucan biosynthetic process positive regulation of endocytosis regulation of cell size	1,3-beta-D-glucan synthase complex actin cap actin cortical patch membrane fraction	CHS3	YBR023C	Chitin synthase III, catalyzes the transfer of N-acetylglucosamine (GlcNAc) to chitin; required for synthesis of the majority of cell wall chitin, the chitin ring during bud emergence, and spore wall chitosan	chitin synthase activity ascospore wall assembly cytokinesis fungal-type cell wall chitin biosynthetic process	cellular bud neck chitosome cytoplasm incipient cellular bud site prospore membrane integral to membrane mating projection tip	Genetic Interaction
HSP82	YPL240C	Hsp90 chaperone required for pheromone signaling and negative regulation of Hsf1p; docks with Tom70p for mitochondrial preprotein delivery; promotes telomerase DNA binding and nucleotide addition; interacts with Cns1p, Cpr6p, Cpr7p, Sti1p	ATPase activity, coupled unfolded protein binding 'de novo' protein folding box C/D snoRNP assembly positive regulation of telomere maintenance via telomerase proteasome assembly protein refolding protein targeting to mitochondrion response to osmotic stress response to stress	cytoplasm	BEM4	YPL161C	Protein involved in establishment of cell polarity and bud emergence; interacts with the Rho1p small GTP-binding protein and with the Rho-type GTPase Cdc42p; involved in maintenance of proper telomere length	actin cytoskeleton organization establishment of cell polarity Rho protein signal transduction	cytoplasm nucleus	Genetic Interaction
HSP82	YPL240C	Hsp90 chaperone required for pheromone signaling and negative regulation of Hsf1p; docks with Tom70p for mitochondrial preprotein delivery; promotes telomerase DNA binding and nucleotide addition; interacts with Cns1p, Cpr6p, Cpr7p, Sti1p	ATPase activity, coupled unfolded protein binding 'de novo' protein folding box C/D snoRNP assembly positive regulation of telomere maintenance via telomerase proteasome assembly protein refolding protein targeting to mitochondrion response to osmotic stress response to stress	cytoplasm	HSC82	YMR186W	Cytoplasmic chaperone of the Hsp90 family, redundant in function and nearly identical with Hsp82p, and together they are essential; expressed constitutively at 10-fold higher basal levels than HSP82 and induced 2-3 fold by heat shock	ATPase activity ATPase activity, coupled unfolded protein binding 'de novo' protein folding box C/D snoRNP assembly proteasome assembly protein folding protein refolding response to stress telomere maintenance	cytoplasm mitochondrion plasma membrane enriched fraction	Physical Interaction, Genetic Interaction
HSP82	YPL240C	Hsp90 chaperone required for pheromone signaling and negative regulation of Hsf1p; docks with Tom70p for mitochondrial preprotein delivery; promotes telomerase DNA binding and nucleotide addition; interacts with Cns1p, Cpr6p, Cpr7p, Sti1p	ATPase activity, coupled unfolded protein binding 'de novo' protein folding box C/D snoRNP assembly positive regulation of telomere maintenance via telomerase proteasome assembly protein refolding protein targeting to mitochondrion response to osmotic stress response to stress	cytoplasm	NUM1	YDR150W	Protein required for nuclear migration, localizes to the mother cell cortex and the bud tip; may mediate interactions of dynein and cytoplasmic microtubules with the cell cortex	tubulin binding microtubule cytoskeleton organization mitochondrial fission mitochondrion inheritance nuclear migration along microtubule	cell cortex cellular bud tip mitochondrion	Genetic Interaction
LHS1	YKL073W	Molecular chaperone of the endoplasmic reticulum lumen, involved in polypeptide translocation and folding; nucleotide exchange factor for the ER lumenal Hsp70 chaperone Kar2p; regulated by the unfolded protein response pathway	adenyl-nucleotide exchange factor activity ATP binding unfolded protein binding posttranslational protein targeting to membrane, translocation response to unfolded protein	endoplasmic reticulum lumen	KAR2	YJL034W	ATPase involved in protein import into the ER, also acts as a chaperone to mediate protein folding in the ER and may play a role in ER export of soluble proteins; regulates the unfolded protein response via interaction with Ire1p	ATPase activity unfolded protein binding ER-associated protein catabolic process karyogamy involved in conjugation with cellular fusion posttranslational protein targeting to membrane, translocation response to unfolded protein SRP-dependent cotranslational protein targeting to membrane, translocation	ndoplasmic reticulum luminal surveillance complex	Genetic Interaction	[43-48]
NOP56	YLR197W	Essential evolutionarily-conserved nucleolar protein component of the box C/D snoRNP complexes that direct 2'-O-methylation of pre-rRNA during its maturation; overexpression causes spindle orientation defects	rRNA modification rRNA processing	box C/D snoRNP complex nucleolus small-subunit processome 90S preribosome	NOP1	YDL014W	Nucleolar protein, component of the small subunit processome complex, which is required for processing of pre-18S rRNA; has similarity to mammalian fibrillarin	methyltransferase activity box C/D snoRNA 3'-end processing RNA methylation rRNA methylation rRNA processing snoRNA processing	box C/D snoRNP complex nucleolus small-subunit processome	Physical Interaction, Genetic Interaction
NOP8	YOL144W	Nucleolar protein required for 60S ribosomal subunit biogenesis	ribosomal large subunit biogenesis	nucleolus	DBP6	YNR038W	Essential protein involved in ribosome biogenesis; putative ATP-dependent RNA helicase of the DEAD-box protein family	ATP-dependent RNA helicase activity maturation of 5.8S rRNA from tricistronic rRNA transcript (SSU-rRNA, 5.8S rRNA, LSU-rRNA) maturation of LSU-rRNA from tricistronic rRNA transcript (SSU-rRNA, 5.8S rRNA, LSU-rRNA)	nucleolus preribosome, large subunit precurs	Genetic Interaction
NUP100	YKL068W	FG-nucleoporin component of central core of the nuclear pore complex (NPC); contributes directly to nucleocytoplasmic transport and maintenance of the NPC permeability barrier and is involved in gene tethering at the nuclear periphery; homologous to Nup116p	nucleocytoplasmic transporter activity structural constituent of nuclear pore mRNA export from nucleus mRNA export from nucleus in response to heat stress NLS-bearing substrate import into nucleus positive regulation of transcription, DNA-dependent posttranscriptional tethering of RNA polymerase II gene DNA at nuclear periphery protein import into nucleus protein targeting to nuclear inner membra…	nuclear pore nuclear pore central transport channel	NUP116	YMR047C	FG-nucleoporin component of central core of the nuclear pore complex (NPC); contributes directly to nucleocytoplasmic transport and maintenance of the NPC permeability barrier; forms a stable association with Nup82p, Gle2p and two other FG-nucleoporins (Nsp1p and Nup159p)	nucleocytoplasmic transporter activity structural constituent of nuclear pore mRNA export from nucleus nuclear pore organization poly protein import into nucleus ribosomal large subunit export from nucleus tRNA export from nucleus	nuclear pore nuclear pore central transport channel nuclear pore cytoplasmic filaments	Physical Interaction, Genetic Interaction
NUP120	YKL057C	Subunit of the Nup84p subcomplex of the nuclear pore complex (NPC); contributes to nucleocytoplasmic transport and NPC biogenesis and is involved in establishment of a normal nucleocytoplasmic concentration gradient of the GTPase Gsp1p; also plays roles in several processes that may require localization of genes or chromosomes at the nuclear periphery, including double-strand break repair, transc…	structural constituent of nuclear pore double-strand break repair maintenance of chromatin silencing at telomere mRNA export from nucleus mRNA export from nucleus in response to heat stress negative regulation of transcription from RNA polymerase II promoter nuclear pore distribution positive regulation of transcription from RNA polymerase II promoter positive regulation of transcription, DNA-dep…	nuclear pore nuclear pore outer ring	NUP170	YBL079W	Subunit of the inner ring of the nuclear pore complex (NPC); contributes to NPC assembly and nucleocytoplasmic transport; has similarity to Nup157p; both Nup170p and NUP157p are similar to human Nup155p	structural constituent of nuclear pore chromosome segregation mitotic cell cycle spindle assembly checkpoint nuclear pore complex assembly nucleocytoplasmic transport protein targeting to nuclear inner membrane	nuclear pore nuclear pore inner ring	Physical Interaction, Genetic Interaction
NUP120	YKL057C	Subunit of the Nup84p subcomplex of the nuclear pore complex (NPC); contributes to nucleocytoplasmic transport and NPC biogenesis and is involved in establishment of a normal nucleocytoplasmic concentration gradient of the GTPase Gsp1p; also plays roles in several processes that may require localization of genes or chromosomes at the nuclear periphery, including double-strand break repair, transc…	structural constituent of nuclear pore double-strand break repair maintenance of chromatin silencing at telomere mRNA export from nucleus mRNA export from nucleus in response to heat stress negative regulation of transcription from RNA polymerase II promoter nuclear pore distribution positive regulation of transcription from RNA polymerase II promoter positive regulation of transcription, DNA-dep…	nuclear pore nuclear pore outer ring	NUP188	YML103C	Subunit of the inner ring of the nuclear pore complex (NPC); contributes to NPC organization and nucleocytoplasmic transport; homologous to human NUP188	structural constituent of nuclear pore mRNA export from nucleus in response to heat stress nuclear pore organization protein import into nucleus	nuclear pore nuclear pore inner ring	Genetic Interaction
NUP133	YKR082W	Subunit of the Nup84p subcomplex of the nuclear pore complex (NPC); contributes to nucleocytoplasmic transport and NPC biogenesis and is involved in establishment of a normal nucleocytoplasmic concentration gradient of the GTPase Gsp1p; also plays roles in several processes that may require localization of genes or chromosomes at the nuclear periphery, including double-strand break repair, transc…	structural constituent of nuclear pore chromatin silencing at silent mating-type cassette double-strand break repair maintenance of chromatin silencing at telomere mRNA export from nucleus in response to heat stress negative regulation of transcription from RNA polymerase II promoter nuclear pore distribution poly(A)+ mRNA export from nucleus positive regulation of transcription from RNA polymera…	nuclear pore nuclear pore outer ring integral to membrane	POM152	YMR129W	Glycoprotein subunit of the transmembrane ring of the nuclear pore complex (NPC); contributes to nucleocytoplasmic transport, NPC biogenesis and spindle pole body duplication; homologous to human NUP210	protein anchor structural constituent of nuclear pore nuclear pore organization nucleocytoplasmic transport protein import into nucleus spindle pole body duplication in nuclear envelope	nuclear envelope lumen nuclear pore nuclear pore transmembrane ring integral to membrane mitochondrion	Genetic Interaction
ORC5	YNL261W	Subunit of the origin recognition complex, which directs DNA replication by binding to replication origins and is also involved in transcriptional silencing	ATP binding DNA replication origin binding chromatin silencing at silent mating-type cassette DNA-dependent DNA replication initiation pre-replicative complex assembly regulation of chromatin silencing at telomere	DNA replication preinitiation complex nuclear origin of replication recognition complex pre-replicative complex	ORC2	YBR060C	Subunit of the origin recognition complex, which directs DNA replication by binding to replication origins and is also involved in transcriptional silencing; interacts with Spp1p and with trimethylated histone H3; phosphorylated by Cdc28p	chromatin binding DNA replication origin binding chromatin silencing at silent mating-type cassette chromatin silencing at telomere DNA-dependent DNA replication initiation histone H3-K4 methylation pre-replicative complex assembly	DNA replication preinitiation complex nuclear origin of replication recognition complex pre-replicative complex	Physical Interaction, Genetic Interaction
ORC6	YHR118C	Subunit of the origin recognition complex, which directs DNA replication by binding to replication origins and is also involved in transcriptional silencing; phosphorylated by Cdc28p	DNA replication origin binding chromatin silencing at silent mating-type cassette DNA-dependent DNA replication initiation pre-replicative complex assembly	DNA replication preinitiation complex nuclear origin of replication recognition complex pre-replicative complex	DDC1	YPL194W	DNA damage checkpoint protein, part of a PCNA-like complex required for DNA damage response, required for pachytene checkpoint to inhibit cell cycle in response to unrepaired recombination intermediates; potential Cdc28p substrate	cell cycle checkpoint G2/M transition checkpoint intra-S DNA damage checkpoint meiosis mitotic cell cycle G1/S transition checkpoint recombinational repair	checkpoint clamp complex condensed nuclear chromosome	Genetic Interaction
OST3	YOR085W	Gamma subunit of the oligosaccharyltransferase complex of the ER lumen, which catalyzes asparagine-linked glycosylation of newly synthesized proteins; Ost3p is important for N-glycosylation of a subset of proteins	dolichyl-diphosphooligosaccharide-protein glycotransferase activity protein complex assembly protein glycosylation protein N-linked glycosylation protein O-linked mannosylation	integral to membrane oligosaccharyltransferase complex integral to membrane	ALG8	YOR067C	Glucosyl transferase, involved in N-linked glycosylation; adds glucose to the dolichol-linked oligosaccharide precursor prior to transfer to protein during lipid-linked oligosaccharide biosynthesis; similar to Alg6p	dolichyl pyrophosphate Glc1Man9GlcNAc2 alpha-1,3-glucosyltransferase activity oligosaccharide-lipid intermediate biosynthetic process protein N-linked glycosylation	endoplasmic reticulum membrane integral to membrane	Genetic Interaction
PAC10	YGR078C	Part of the heteromeric co-chaperone GimC/prefoldin complex, which promotes efficient protein folding	tubulin binding tubulin complex assembly	cytoplasm polysome prefoldin complex	CHL4	YDR254W	Outer kinetochore protein required for chromosome stability; involved in new kinetochore assembly and sister chromatid cohesion; peripheral component of the Ctf19 kinetochore subcomplex that interacts with Ctf19p, Ctf3p, Iml3p and Mif2p	structural molecule activity chromosome segregation establishment of meiotic sister chromatid cohesion establishment of mitotic sister chromatid cohesion kinetochore assembly maintenance of meiotic sister chromatid cohesion protein localization to chromosome, centromeric region	condensed nuclear chromosome outer kinetochore	Genetic Interaction
PAC10	YGR078C	Part of the heteromeric co-chaperone GimC/prefoldin complex, which promotes efficient protein folding	tubulin binding tubulin complex assembly	cytoplasm polysome prefoldin complex	CTF19	YPL018W	outer kinetochore protein, required for accurate mitotic chromosome segregation; component of the kinetochore sub-complex COMA (Ctf19p, Okp1p, Mcm21p, Ame1p) that functions as a platform for kinetochore assembly	attachment of spindle microtubules to kinetochore chromosome segregation establishment of mitotic sister chromatid cohesion	COMA complex condensed nuclear chromosome kinetochore nucleus	Genetic Interaction
POM152	YMR129W	Glycoprotein subunit of the transmembrane ring of the nuclear pore complex (NPC); contributes to nucleocytoplasmic transport, NPC biogenesis and spindle pole body duplication; homologous to human NUP210	protein anchor structural constituent of nuclear pore nuclear pore organization nucleocytoplasmic transport protein import into nucleus spindle pole body duplication in nuclear envelope	nuclear envelope lumen nuclear pore nuclear pore transmembrane ring integral to membrane mitochondrion	NIC96	YFR002W	Linker nucleoporin component of the nuclear pore complex (NPC); also part of the NPC nuclear basket; contributes to nucleocytoplasmic transport and NPC biogenesis; forms stable associations with three FG-nucleoporins (Nsp1p, Nup57p, and Nup49p)	structural constituent of nuclear pore nuclear pore organization protein import into nucleus ribosomal large subunit export from nucleus	nuclear pore nuclear pore linkers nuclear pore nuclear basket integral to membrane	Physical Interaction, Genetic Interaction
RAD27	YKL113C	5' to 3' exonuclease, 5' flap endonuclease, required for Okazaki fragment processing and maturation as well as for long-patch base-excision repair; member of the S. pombe RAD2/FEN1 family	5'-3' exonuclease activity 5'-flap endonuclease activity base-excision repair, base-free sugar-phosphate removal DNA replication, removal of RNA primer double-strand break repair via nonhomologous end joining gene conversion at mating-type locus, DNA repair synthesis replicative cell aging	mitochondrion nucleus	EXO1	YOR033C	5'-3' exonuclease and flap-endonuclease involved in recombination, double-strand break repair and DNA mismatch repair; member of the Rad2p nuclease family, with conserved N and I nuclease domains	5'-3' exonuclease activity 5'-flap endonuclease activity DNA double-strand break processing gene conversion at mating-type locus, DNA double-strand break processing meiotic DNA double-strand break processing mismatch repair telomere maintenance telomeric 3' overhang formation	nucleus	Genetic Interaction	[49]
RAD55	YDR076W	Protein that stimulates strand exchange by stabilizing the binding of Rad51p to single-stranded DNA; involved in the recombinational repair of double-strand breaks in DNA during vegetative growth and meiosis; forms heterodimer with Rad57p	DNA-dependent ATPase activity protein heterodimerization activity DNA recombinase assembly NOT double-strand break repair via single-strand annealing heteroduplex formation meiotic DNA recombinase assembly	nucleus Rhp55-Rhp57 complex	RNR4	YGR180C	Ribonucleotide-diphosphate reductase (RNR), small subunit; the RNR complex catalyzes the rate-limiting step in dNTP synthesis and is regulated by DNA replication and DNA damage checkpoint pathways via localization of the small subunits	contributes_to ribonucleoside-diphosphate reductase activity, thioredoxin disulfide as acceptor ribonucleoside-diphosphate reductase activity, thioredoxin disulfide as acceptor cofactor biosynthetic process deoxyribonucleotide biosynthetic process	cytoplasm nucleus ribonucleoside-diphosphate reductase complex	Genetic Interaction
RAD6	YGL058W	Ubiquitin-conjugating enzyme (E2), involved in postreplication repair (as a heterodimer with Rad18p), DSBR and checkpoint control (as a heterodimer with Bre1p), ubiquitin-mediated N-end rule protein degradation (as a heterodimer with Ubr1p	ubiquitin-protein ligase activity chromatin silencing at telomere double-strand break repair via homologous recombination error-free postreplication DNA repair error-free translesion synthesis error-prone translesion synthesis histone monoubiquitination meiotic DNA double-strand break formation mitotic cell cycle G1/S transition DNA damage checkpoint protein monoubiquitination protein polyubiquit…	cytoplasm colocalizes_withnuclear chromatin nucleus colocalizes_withproteasome complex	UBP6	YFR010W	Ubiquitin-specific protease situated in the base subcomplex of the 26S proteasome, releases free ubiquitin from branched polyubiquitin chains; works in opposition to Hul5p polyubiquitin elongation activity; mutant has aneuploidy tolerance (	ubiquitin-specific protease activity protein deubiquitination	proteasome complex proteasome regulatory particle	Genetic Interaction
SAP30	YMR263W	Subunit of a histone deacetylase complex, along with Rpd3p and Sin3p, that is involved in silencing at telomeres, rDNA, and silent mating-type loci; involved in telomere maintenance	histone deacetylase activity negative regulation of chromatin silencing at rDNA negative regulation of chromatin silencing at silent mating-type cassette negative regulation of chromatin silencing at telomere negative regulation of transcription from RNA polymerase I promoter positive regulation of transcription from RNA polymerase II promoter positive regulation of transcription from RNA polymer…	histone deacetylase complex Rpd3L complex Rpd3L complex Rpd3L-Expanded complex	SIF2	YBR103W	WD40 repeat-containing subunit of the Set3C histone deacetylase complex, which represses early/middle sporulation genes; antagonizes telomeric silencing; binds specifically to the Sir4p N-terminus	histone deacetylation negative regulation of chromatin silencing at telomere negative regulation of meiosis positive regulation of stress-activated MAPK cascade regulation of transcription, DNA-dependent	nucleus Set3 complex High-throughput Rpd3L-Expanded complex	Genetic Interaction
SEC8	YPR055W	Essential 121kDa subunit of the exocyst complex (Sec3p, Sec5p, Sec6p, Sec8p, Sec10p, Sec15p, Exo70p, and Exo84p), which has the essential function of mediating polarized targeting of secretory vesicles to active sites of exocytosis	bipolar cellular bud site selection cytokinesis Golgi to plasma membrane transport vesicle docking involved in exocytosis vesicle fusion	cellular bud tip exocyst incipient cellular bud site site of polarized growth mating projection tip	SEC2	YNL272C	Guanyl-nucleotide exchange factor for the small G-protein Sec4p; essential for post-Golgi vesicle transport and for autophagy; associates with the exocyst, via exocyst subunit Sec15p, on secretory vesicles	guanyl-nucleotide exchange factor activity phosphatidylinositol-4-phosphate binding autophagy exocytosis	ellular bud neck cellular bud tip cytosol transport vesicle mating projection tip	Genetic Interaction
SED5	YLR026C	cis-Golgi t-SNARE syntaxin required for vesicular transport between the ER and the Golgi complex, binds at least 9 SNARE proteins	SNAP receptor activity ER to Golgi vesicle-mediated transport intra-Golgi vesicle-mediated transport vesicle fusion vesicle fusion with Golgi apparatus	cis-Golgi network integral to membrane SNARE complex	COG3	YER157W	Essential component of the conserved oligomeric Golgi complex (Cog1p through Cog8p), a cytosolic tethering complex that functions in protein trafficking to mediate fusion of transport vesicles to Golgi compartments	protein transporter activity CVT pathway ER to Golgi vesicle-mediated transport intra-Golgi vesicle-mediated transport macroautophagy peroxisome degradation retrograde transport, vesicle recycling within Golgi	Golgi transport complex peripheral to membrane of membrane fraction soluble fraction	Physical Interaction, Genetic Interaction
SHE4	YOR035C	Protein containing a UCS (UNC-45/CRO1/SHE4) domain, binds to myosin motor domains to regulate myosin function; involved in endocytosis, polarization of the actin cytoskeleton, and asymmetric mRNA localization	myosin binding actin cytoskeleton organization intracellular mRNA localization mating type switching	cytoplasm	ARP2	YDL029W	Essential component of the Arp2/3 complex, which is a highly conserved actin nucleation center required for the motility and integrity of actin patches; involved in endocytosis and membrane growth and polarit	adenyl-nucleotide exchange factor activity ATP binding unfolded protein binding posttranslational protein targeting to membrane, translocation response to unfolded protein	endoplasmic reticulum lumen	Genetic Interaction
SIL1	YOL031C	Nucleotide exchange factor for the endoplasmic reticulum (ER) lumenal Hsp70 chaperone Kar2p, required for protein translocation into the ER; homolog of Yarrowia lipolytica SLS1; GrpE-like protei	adenyl-nucleotide exchange factor activity SRP-dependent cotranslational protein targeting to membrane, translocation	endoplasmic reticulum	KAR2	YJL034W	ATPase involved in protein import into the ER, also acts as a chaperone to mediate protein folding in the ER and may play a role in ER export of soluble proteins; regulates the unfolded protein response via interaction with Ire1p	ATPase activity unfolded protein binding ER-associated protein catabolic process karyogamy involved in conjugation with cellular fusion posttranslational protein targeting to membrane, translocation response to unfolded protein SRP-dependent cotranslational protein targeting to membrane, translocation	ndoplasmic reticulum luminal surveillance complex	Physical Interaction, Genetic Interaction	[43-48]
SLT2	YHR030C	Serine/threonine MAP kinase; involved in regulating maintenance of cell wall integrity, progression through the cell cycle, and nuclear mRNA retention in heat shock; required for mitophagy and pexophagy; affects recruitment of mitochondria to the phagophore assembly site (PAS); regulated by the PKC1-mediated signaling pathway	MAP kinase activity protein serine/threonine kinase activity protein kinase activity barrier septum assembly endoplasmic reticulum unfolded protein response fungal-type cell wall organization peroxisome degradation protein phosphorylation regulation of cell size regulation of transcription factor import into nucleus response to acid signal transduction UFP-specific transcription factor mRNA proce…	cellular bud tip nucleus cytoplasm	CHS3	YBR023C	Chitin synthase III, catalyzes the transfer of N-acetylglucosamine (GlcNAc) to chitin; required for synthesis of the majority of cell wall chitin, the chitin ring during bud emergence, and spore wall chitosan	chitin synthase activity ascospore wall assembly cytokinesis fungal-type cell wall chitin biosynthetic process	cellular bud neck chitosome cytoplasm incipient cellular bud site prospore membrane integral to membrane mating projection tip	Genetic Interaction	[29, 50, 58]
SLY1	YDR189W	Hydrophilic protein involved in vesicle trafficking between the ER and Golgi; SM (Sec1/Munc-18) family protein that binds the tSNARE Sed5p and stimulates its assembly into a trans-SNARE membrane-protein complex	SNARE binding syntaxin binding ER to Golgi vesicle-mediated transport positive regulation of SNARE complex assembly retrograde vesicle-mediated transport, Golgi to ER vesicle fusion with Golgi apparatus	endoplasmic reticulum ER to Golgi transport vesicle Golgi membrane colocalizes_with SNARE complex	TIP20	YGL145W	Peripheral membrane protein required for fusion of COPI vesicles with the ER; prohibits back-fusion of COPII vesicles with the ER; forms a tethering complex with Sec39p and Dsl1p that interacts with ER SNAREs Sec20p and Use1p	retrograde vesicle-mediated transport, Golgi to ER	Dsl1p complex endoplasmic reticulum	Genetic Interaction
SLY1	YDR189W	Hydrophilic protein involved in vesicle trafficking between the ER and Golgi; SM (Sec1/Munc-18) family protein that binds the tSNARE Sed5p and stimulates its assembly into a trans-SNARE membrane-protein complex	SNARE binding syntaxin binding ER to Golgi vesicle-mediated transport positive regulation of SNARE complex assembly retrograde vesicle-mediated transport, Golgi to ER vesicle fusion with Golgi apparatus	endoplasmic reticulum ER to Golgi transport vesicle Golgi membrane colocalizes_with SNARE complex	USO1	YDL058W	Essential protein involved in the vesicle-mediated ER to Golgi transport step of secretion; binds membranes and functions during vesicle docking to the Golgi; required for assembly of the ER-to-Golgi SNARE complex	ER to Golgi vesicle-mediated transport Golgi vesicle docking SNARE complex assembly	ER to Golgi transport vesicle membrane Golgi membrane	Genetic Interaction
SPC72	YAL047C	Component of the cytoplasmic Tub4p (gamma-tubulin) complex, binds spindle pole bodies and links them to microtubules; has roles in astral microtubule formation and stabilization	structural constituent of cytoskeleton microtubule nucleation mitotic cell cycle spindle orientation checkpoint mitotic sister chromatid segregation mitotic spindle elongation nuclear migration along microtubule	outer plaque of spindle pole body	BUB2	YMR055C	Mitotic exit network regulator, forms GTPase-activating Bfa1p-Bub2p complex that binds Tem1p and spindle pole bodies, blocks cell cycle progression before anaphase in response to spindle and kinetochore damage	GTPase activator activity, mitotic cell cycle spindle orientation checkpoint, regulation of exit from mitosis	spindle pole body	Genetic Interaction
SPC98	YNL126W	Component of the microtubule-nucleating Tub4p (gamma-tubulin) complex; interacts with Spc110p at the spindle pole body (SPB) inner plaque and with Spc72p at the SPB outer plaque	structural constituent of cytoskeleton microtubule nucleation mitotic spindle organization in nucleus	gamma-tubulin small complex, spindle pole body inner plaque of spindle pole body outer plaque of spindle pole body	TUB4	YLR212C	Gamma-tubulin, involved in nucleating microtubules from both the cytoplasmic and nuclear faces of the spindle pole body	structural constituent of cytoskeleton microtubule nucleation mitotic spindle organization in nucleus	gamma-tubulin small complex, spindle pole body inner plaque of spindle pole body outer plaque of spindle pole body	Physical Interaction, Genetic Interaction
STI1	YOR027W	Hsp90 cochaperone, interacts with the Ssa group of the cytosolic Hsp70 chaperones and activates Ssa1p ATPase activity; interacts with Hsp90 chaperones and inhibits their ATPase activity; homolog of mammalian Hop	ATPase inhibitor activity Hsp70 protein binding Hsp90 protein binding mRNA binding protein folding	cytoplasm	HSC82	YMR186W	Cytoplasmic chaperone of the Hsp90 family, redundant in function and nearly identical with Hsp82p, and together they are essential; expressed constitutively at 10-fold higher basal levels than HSP82 and induced 2-3 fold by heat shock	ATPase activity ATPase activity, coupled unfolded protein binding 'de novo' protein folding box C/D snoRNP assembly proteasome assembly protein folding protein refolding response to stress telomere maintenance	cytoplasm mitochondrion plasma membrane enriched fraction	Physical Interaction, Genetic Interaction
STO1	YMR125W	Large subunit of the nuclear mRNA cap-binding protein complex, interacts with Npl3p to carry nuclear poly(A)+ mRNA to cytoplasm; also involved in nuclear mRNA degradation and telomere maintenance; orthologous to mammalian CBP80	mRNA binding nuclear mRNA splicing, via spliceosome nuclear-transcribed mRNA catabolic process, nonsense-mediated decay response to osmotic stress	commitment complex nuclear cap binding complex polysome	SNU56	YDR240C	Component of U1 snRNP required for mRNA splicing via spliceosome; yeast specific, no metazoan counterpart; interacts with mRNA in commitment complex	mRNA binding nuclear mRNA splicing, via spliceosome	commitment complex U1 snRNP U2-type prespliceosome	Physical Interaction, Genetic Interaction
SWI6	YLR182W	Transcription cofactor; forms complexes with Swi4p and Mbp1p to regulate transcription at the G1/S transition; involved in meiotic gene expression; also binds Stb1p to regulate transcription at START; cell wall stress induces phosphorylation by Mpk1p, which regulates Swi6p localization; required for the unfolded protein response, independently of its known transcriptional coactivators	RNA polymerase II transcription coactivator activity positive regulation of reciprocal meiotic recombination positive regulation of transcription from RNA polymerase II promoter positive regulation of transcription from RNA polymerase II promoter in response to heat stress positive regulation of transcription involved in G1/S phase of mitotic cell cycle	ytoplasm MBF transcription complex nucleus SBF transcription complex	CDC6	YJL194W	Essential ATP-binding protein required for DNA replication, component of the pre-replicative complex (pre-RC) which requires ORC to associate with chromatin and is in turn required for Mcm2-7p DNA association; homologous to S. pombe Cdc18p	ATP binding ATPase activity chromatin binding DNA replication origin binding GTP binding GTPase activity protein binding G1/S transition of mitotic cell cycle pre-replicative complex assembly regulation of chromatin silencing at telomere regulation of DNA-dependent DNA replication initiation	DNA replication preinitiation complex pre-replicative complex	Genetic Interaction
TIF3	YPR163C	Translation initiation factor eIF-4B, has RNA annealing activity; contains an RNA recognition motif and binds to single-stranded RNA	RNA binding RNA strand annealing activity translation initiation factor activity cytoplasmic translation translational initiation	ribosome	CDC33	YOL139C	Cytoplasmic mRNA cap binding protein and translation initiation factor eIF4E; the eIF4E-cap complex is responsible for mediating cap-dependent mRNA translation via interactions with translation initiation factor eIF4G (Tif4631p or Tif4632p)	phosphatidylinositol-3-phosphate binding translation initiation factor activity nuclear-transcribed mRNA catabolic process, nonsense-mediated decay regulation of cell cycle translational initiation	cytoplasm cytoplasmic stress granule eukaryotic translation initiation factor 4F complex nucleus ribosome	Genetic Interaction
TOF1	YNL273W	YNL273W	Subunit of a replication-pausing checkpoint complex (Tof1p-Mrc1p-Csm3p) that acts at the stalled replication fork to promote sister chromatid cohesion after DNA damage, facilitating gap repair of damaged DNA; interacts with the MCM helicase	DNA repair DNA replication DNA replication checkpoint maintenance of DNA repeat elements mitotic sister chromatid cohesion replication fork arrest replication fork protection	RAD5	YLR032W	DNA helicase proposed to promote replication fork regression during postreplication repair by template switching; RING finger containing ubiquitin ligase; stimulates the synthesis of free and PCNA-bound polyubiquitin chains by Ubc13p-Mms2p	DNA-dependent ATPase activity four-way junction DNA binding four-way junction helicase activity Y-form DNA binding double-strand break repair free ubiquitin chain polymerization postreplication repair protein polyubiquitination	nuclear chromatin	Genetic Interaction
TUB4	YLR212C	Gamma-tubulin, involved in nucleating microtubules from both the cytoplasmic and nuclear faces of the spindle pole body	structural constituent of cytoskeleton microtubule nucleation mitotic spindle organization in nucleus	gamma-tubulin small complex, spindle pole body inner plaque of spindle pole body outer plaque of spindle pole body	MAD2	YJL030W	Component of the spindle-assembly checkpoint complex; delays the onset of anaphase in cells with defects in mitotic spindle assembly; forms a complex with Mad1p; regulates APC/C activity during prometaphase and metaphase of meiosis I	chromosome decondensation mitotic cell cycle G2/M transition decatenation checkpoint mitotic cell cycle spindle assembly checkpoint	olocalizes_with condensed nuclear chromosome kinetochore mitotic checkpoint complex nuclear pore	Genetic Interaction
UFD1	YGR048W	Substrate-recruiting cofactor of the Cdc48p-Npl4p-Ufd1p segregase; polyubiquitin binding protein that assists in the dislocation of misfolded, ERAD substrates that are subsequently delivered to the proteasome for degradation; involved in the regulated destruction of resident ER membrane proteins, such as HMG-CoA reductase (Hmg1/2p) and cytoplasmic proteins (Fbp1p); involved in mobilizing membrane…	polyubiquitin binding ubiquitin binding cytoplasm-associated proteasomal ubiquitin-dependent protein catabolic process ER-associated misfolded protein catabolic process ER-associated protein catabolic process positive regulation of protein localization to nucleus proteasomal ubiquitin-dependent protein catabolic process retrograde protein transport, ER to cytosol	Cdc48p-Npl4p-Ufd1p AAA ATPase complex nucleus	CDC48	YDL126C	AAA ATPase involved in multiple processes; subunit of a polyubiquitin-selective segregase complex involved in ERAD, cell wall integrity during heat stress and mitotic spindle disassembly; subunit of a complex involved in mitochondria-associated degradation; role in mobilizing membrane bound transcription factors by regulated ubiquitin/proteasome-dependent processing; roles in macroautophagy, PMN,…	cytoplasm-associated proteasomal ubiquitin-dependent protein catabolic process endoplasmic reticulum membrane fusion ER-associated misfolded protein catabolic process ER-associated protein catabolic process macroautophagy mitochondria-associated protein catabolic process mitotic spindle disassembly piecemeal microautophagy of nucleus positive regulation of protein localization to nucleus proteaso…	Cdc48p-Npl4p-Ufd1p AAA ATPase complex Cdc48p-Npl4p-Vms1p AAA ATPase complex cytosol Doa10p ubiquitin ligase complex endoplasmic reticulum membrane microsome colocalizes_withmitochondrion nucleus	Physical Interaction, Genetic Interaction
